# Supplementary material for: Recipient Age and Mortality After Liver Transplantation: A Population-based Cohort Study
Source: PubMed Central journal article supplement — Transplantation. 2018 Nov 21;102(12):2025–32. doi: 10.1097/TP.0000000000002246 (PMC6257104; doi:10.1097/tp.0000000000002246), 2018-11-21
Supplement: tp-102-2025-s002.pdf [file tp-102-2025-s002.pdf]

**Table S1.** Consistency between data of liver transplantation Using Cohen's kappa coefficient

|                       | <b>KONUS vs.<br/>HIRA</b> | <b>HIRA vs.<br/>SMC</b> | <b>SMC vs. HIRA<br/>(SMC)</b> |
|-----------------------|---------------------------|-------------------------|-------------------------------|
| <b>Overall</b>        |                           |                         |                               |
| Follow-up for a year  | 56.9                      | 58.0                    | 68.0                          |
| Follow-up for 3 years | 69.1                      | 65.9                    | 79.1                          |
| <b>Deceased donor</b> |                           |                         |                               |
| Follow-up for a year  | 43.4                      | 47.4                    | 33.6                          |
| Follow-up for 3 years | 55.7                      | 65.7                    | 53.5                          |
| <b>Living donor</b>   |                           |                         |                               |
| Follow-up for a year  | 64.3                      | 62.7                    | 79.1                          |
| Follow-up for 3 years | 74.6                      | 65.9                    | 84.3                          |

**Table S2. Demographic and clinical characteristics of liver transplantation patients, according to age groups ( $\leq 70$  and  $>70$  years).**

|                                | Liver Transplantation |                                  |                           | P-value |
|--------------------------------|-----------------------|----------------------------------|---------------------------|---------|
|                                | Total<br>(N=9,415)    | Age $\leq 70$ years<br>(N=9,331) | Age $>70$ years<br>(N=84) |         |
| <b>Age, years</b>              | 52.2 (9)              | 52.0 (8.8)                       | 73.1 (1.9)                | <.001   |
| <b>Gender</b>                  |                       |                                  |                           | <.001   |
| Men                            | 6,819 (72.4)          | 6,774 (72.6)                     | 45 (53.6)                 |         |
| Women                          | 2,596 (27.6)          | 2,557 (27.4)                     | 39 (46.4)                 |         |
| <b>Underlying disease</b>      |                       |                                  |                           |         |
| Fulminant hepatic failure      | 707 (7.5)             | 697 (7.5)                        | 10 (11.9)                 | 0.124   |
| Alcoholic hepatitis            | 1,237 (13.1)          | 1,231 (13.2)                     | 6 (7.1)                   | 0.102   |
| Viral hepatitis                | 4,275 (45.4)          | 4,233 (45.4)                     | 42 (50.0)                 | 0.396   |
| Neoplasm                       | 1,833 (19.5)          | 1,812 (19.4)                     | 21 (25.0)                 | 0.198   |
| Other                          | 1,666 (17.7)          | 1,656 (17.8)                     | 10 (11.9)                 | 0.163   |
| <b>Hospital admission type</b> |                       |                                  |                           | 0.678   |
| Emergency room                 | 2,542 (27.0)          | 2,521 (27.0)                     | 21 (25.0)                 |         |
| Outpatient                     | 6,873 (73.0)          | 6,810 (73.0)                     | 63 (75.0)                 |         |
| <b>ICU procedures</b>          |                       |                                  |                           |         |
| Vasopressor drugs              | 2,026 (21.5)          | 2,004 (21.5)                     | 22 (26.2)                 | 0.295   |
| Mechanical ventilation*        | 2,185 (23.2)          | 2,148 (23.0)                     | 37 (44.1)                 | <.001   |
| Hemodialysis                   | 1,801 (19.1)          | 1,768 (19.0)                     | 33 (39.3)                 | <.001   |
| ECMO                           | 97 (1.0)              | 96 (1.0)                         | 1 (1.2)                   | 0.884   |
| <b>Year</b>                    |                       |                                  |                           | <.001   |
| 2007-2009                      | 2,373 (25.2)          | 2,370 (25.4)                     | 3 (3.6)                   |         |
| 2010-2012                      | 3,150 (33.5)          | 3,124 (33.5)                     | 26 (31.0)                 |         |
| 2013-2015                      | 3,359 (35.7)          | 3,316 (35.5)                     | 43 (51.2)                 |         |
| 2016(Jan-May)                  | 533 (5.7)             | 521 (5.6)                        | 12 (14.3)                 |         |

Values in the table are numbers and proportions, except for age (mean and SD).

ECMO: Extracorporeal membrane oxygenation.

\* Mechanical ventilation was defined as use for more than 3 days.
